# Supplementary material for: The heterogeneous impact of targeted therapy on the prognosis of stage III/IV colorectal cancer patients with different subtypes of TP53 mutations
Source: PubMed Central journal article supplement (PMC10757131; doi:10.1002/cam4.6766), 2023-12-08
Supplement: CAM4-12-21920-s003.pdf [file CAM4-12-21920-s003.pdf]

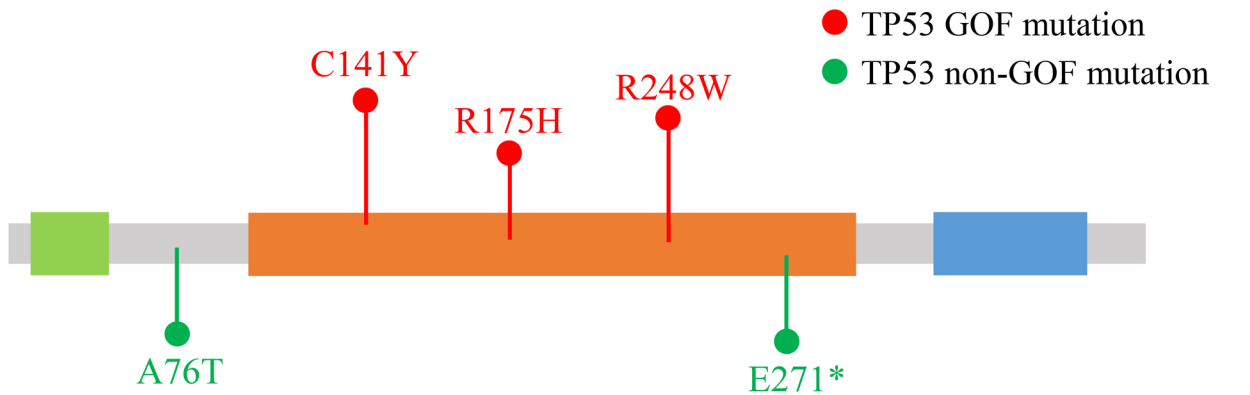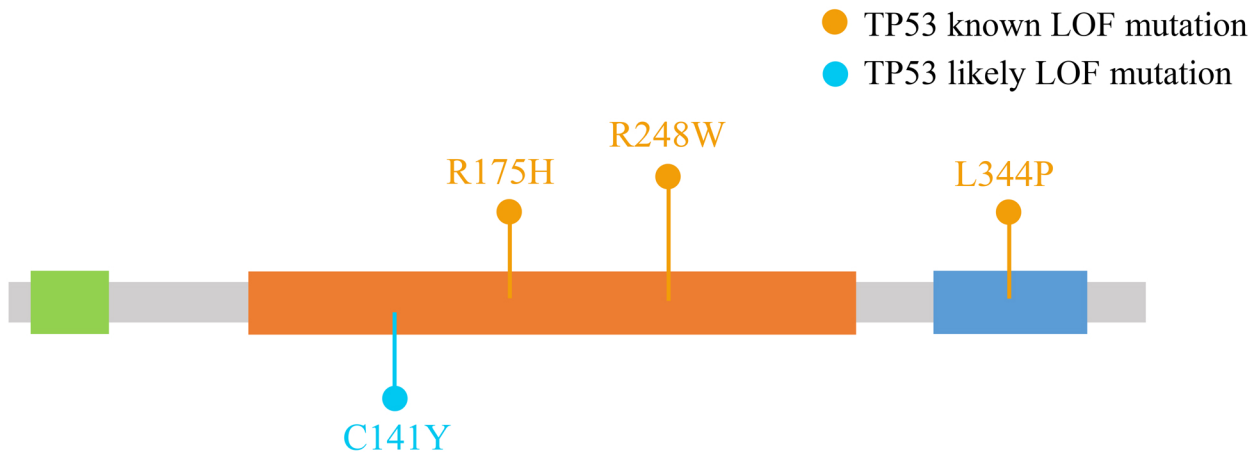

- P53\_TAD: P53 transactivation motif (6 - 29)
- P53: P53 DNA-binding domain (95 - 288)
- P53\_tetramer: P53 tetramerisation motif (318 - 358)
