# Supplementary material for: The heterogeneous impact of targeted therapy on the prognosis of stage III/IV colorectal cancer patients with different subtypes of TP53 mutations
Source: PubMed Central journal article supplement (PMC10757131; doi:10.1002/cam4.6766), 2023-12-08

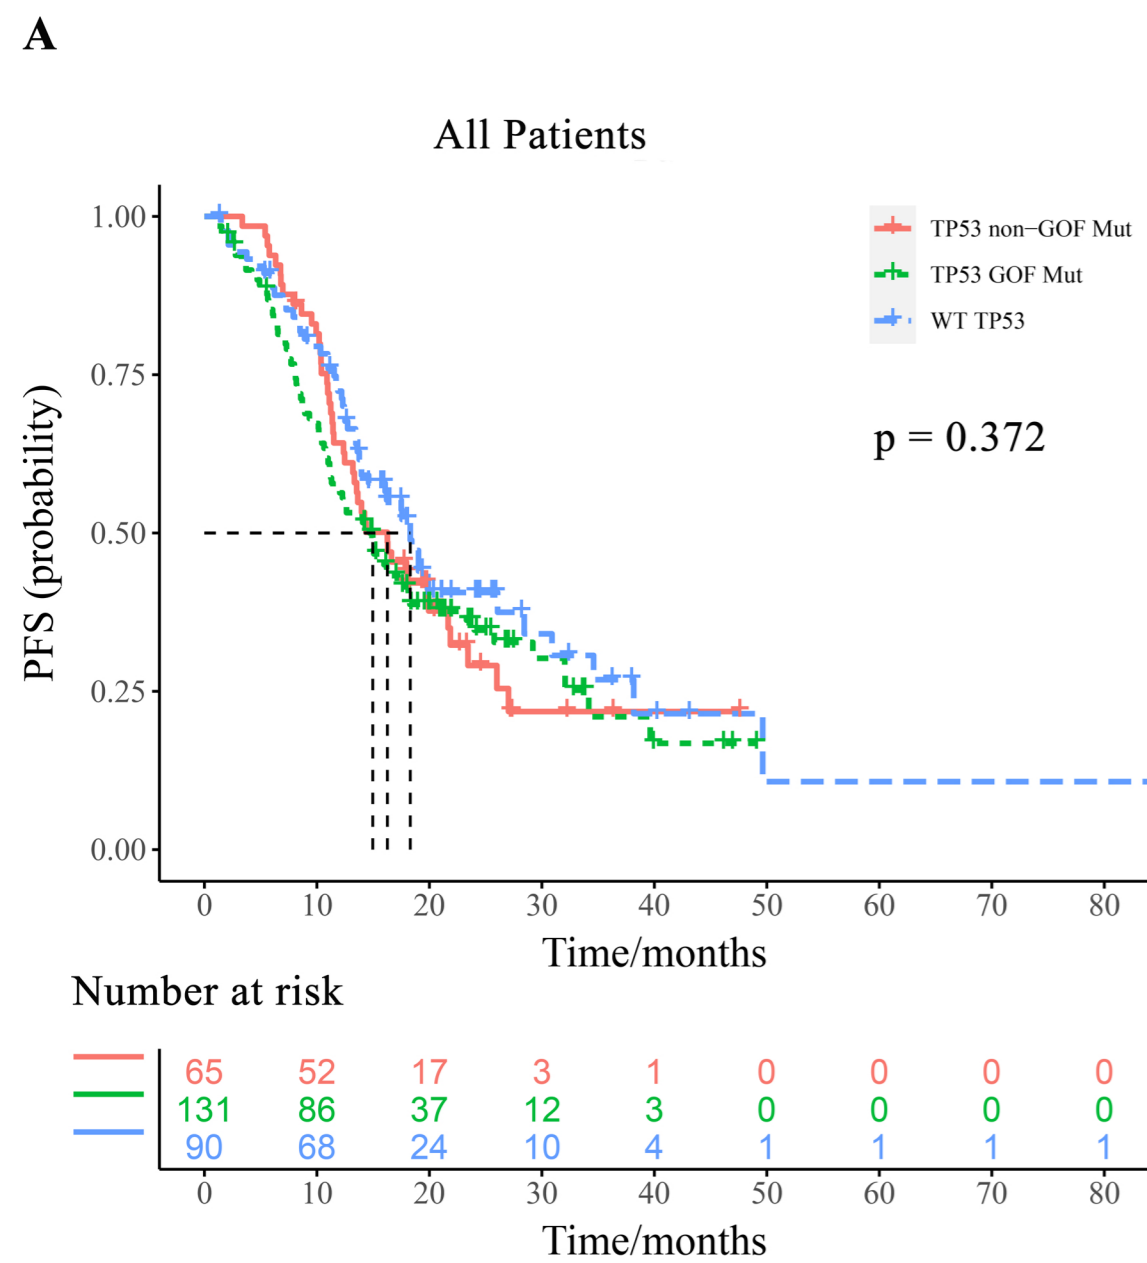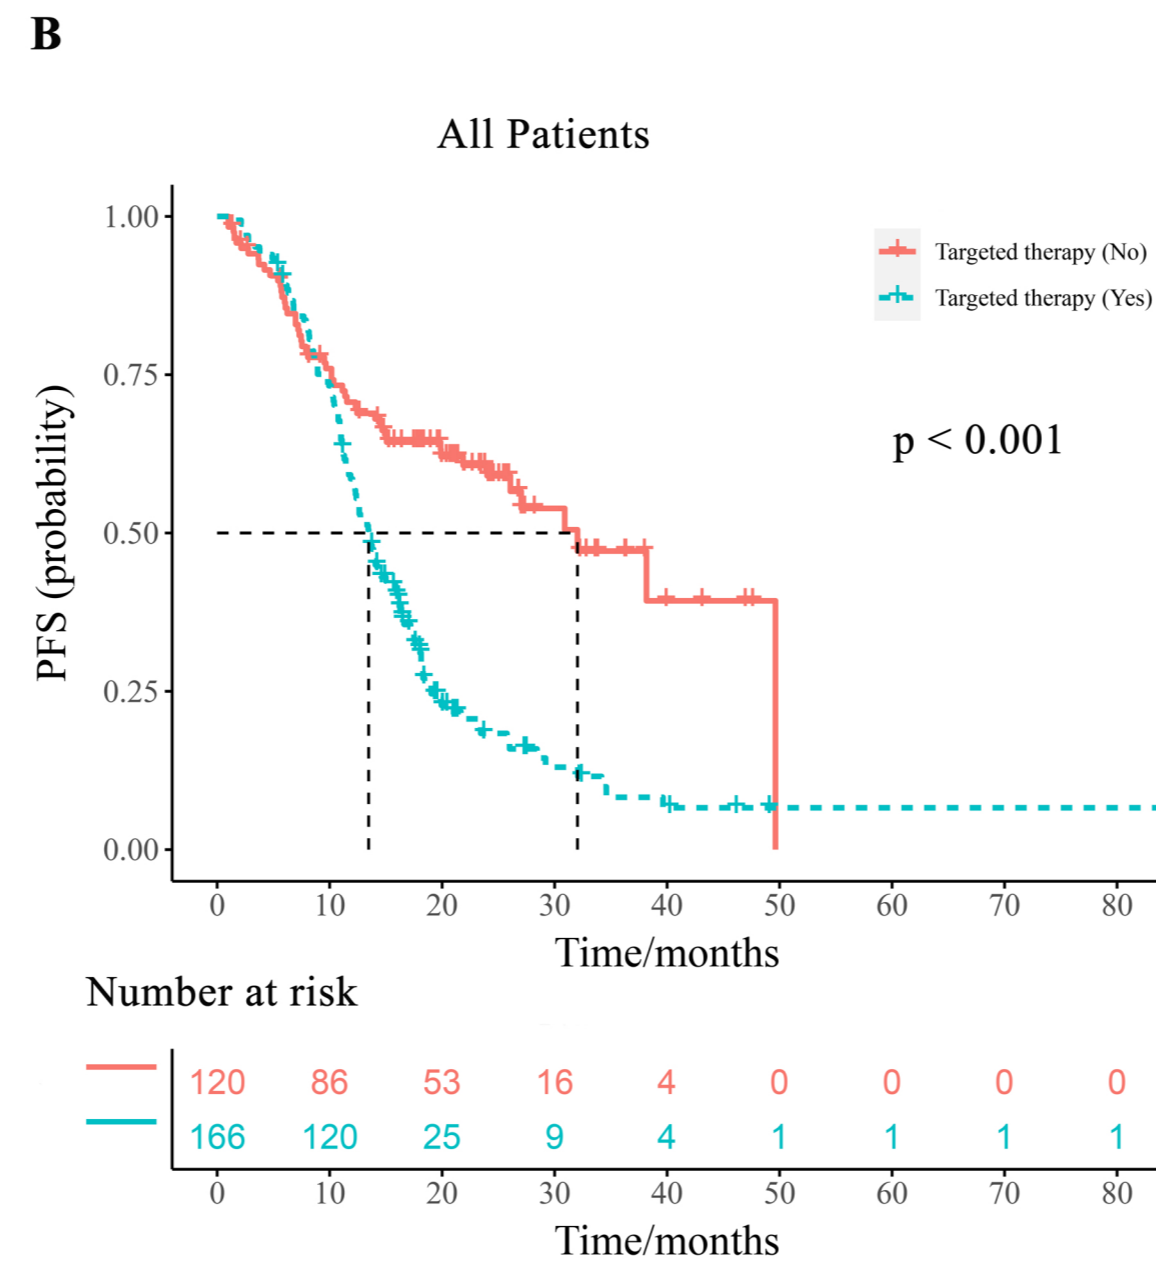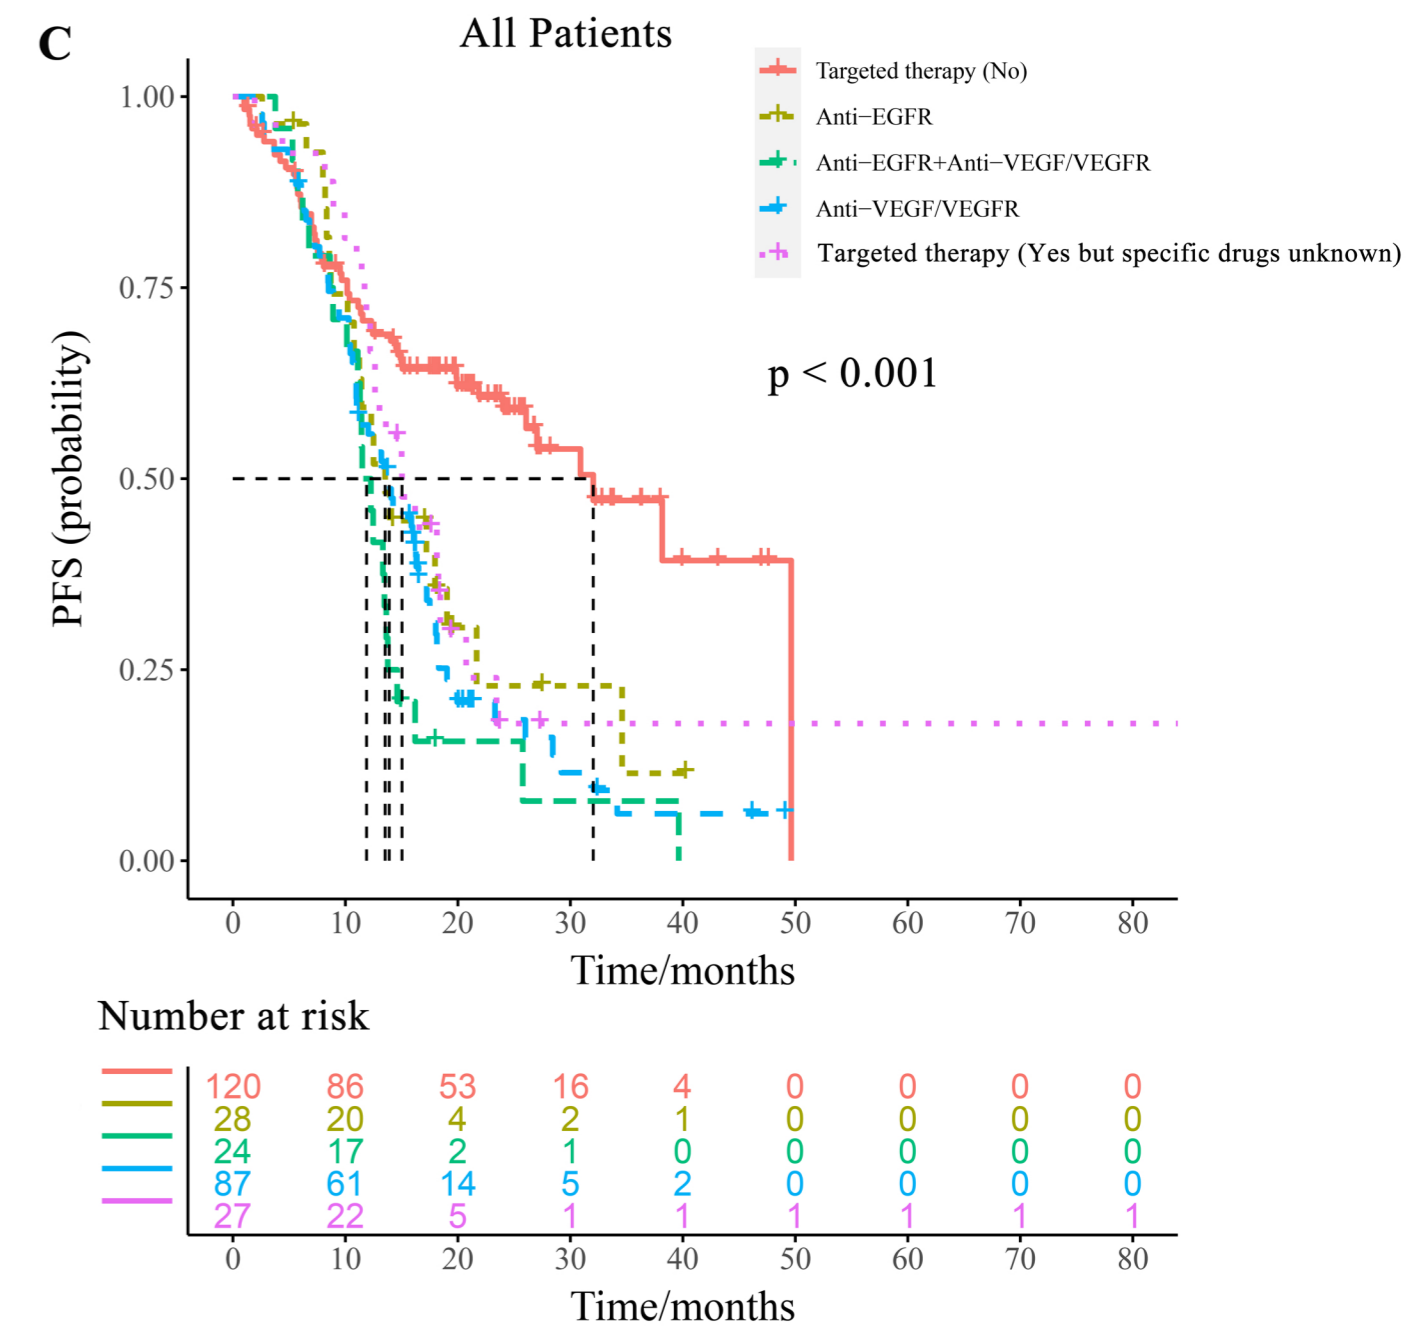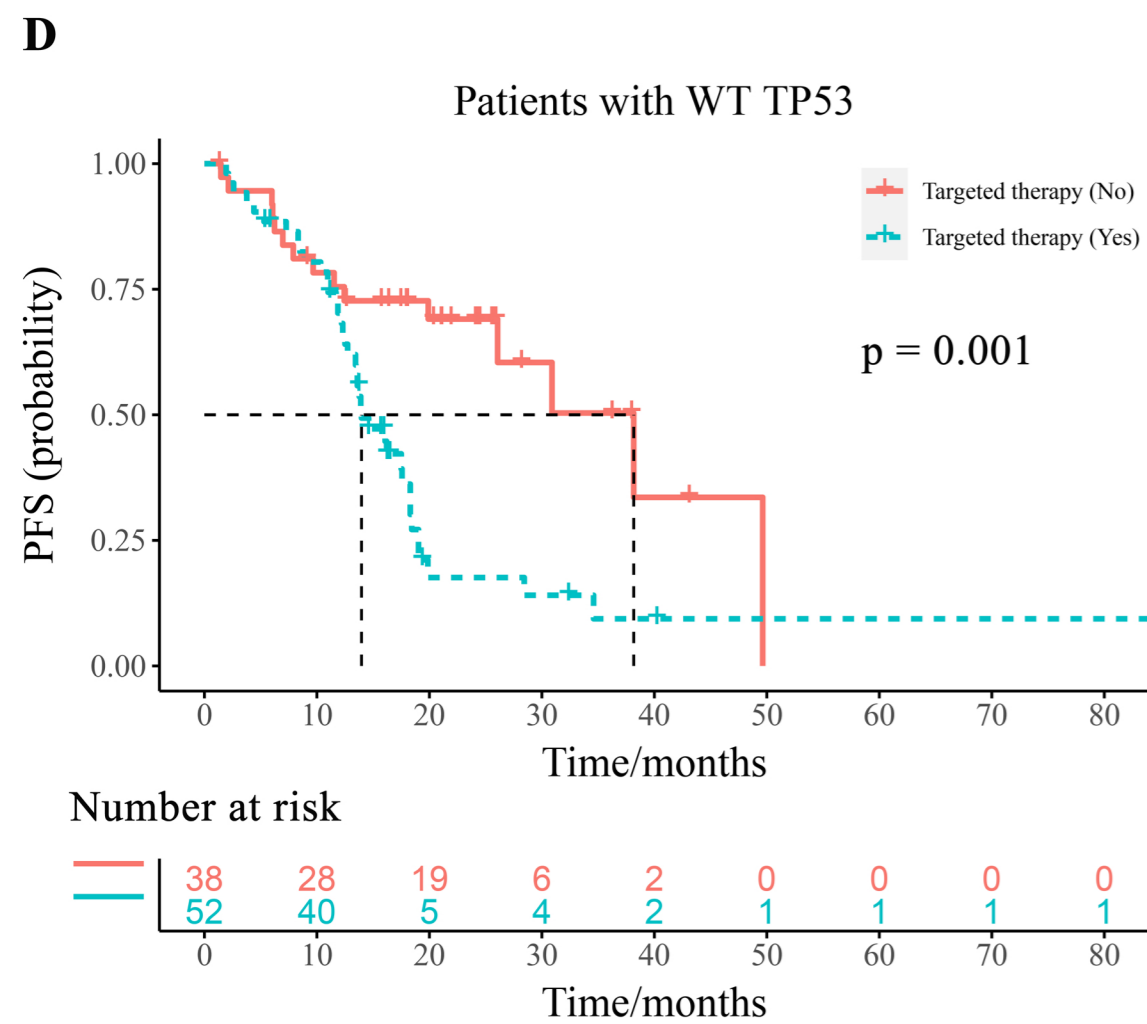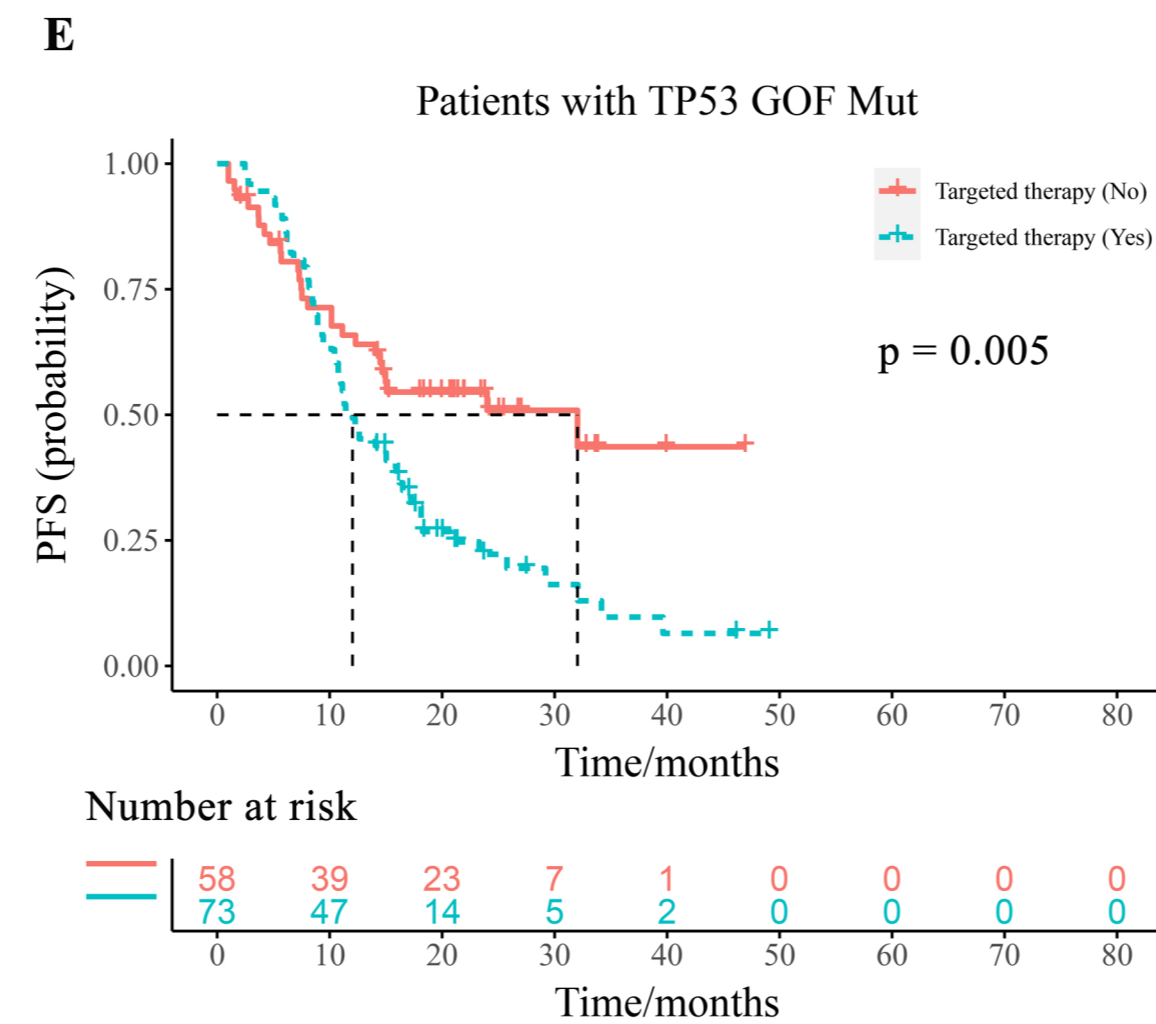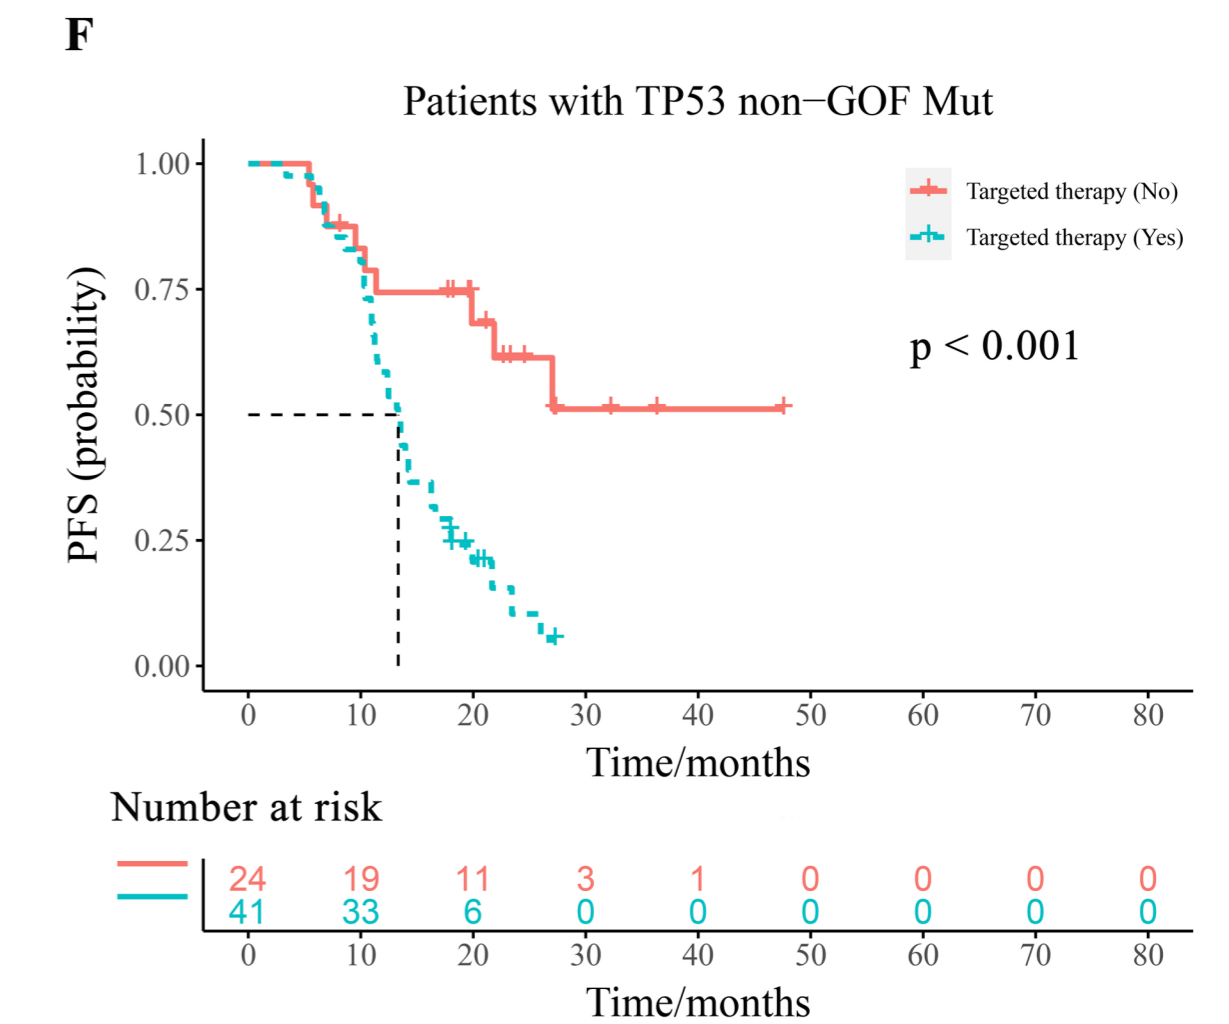

Supplement: CAM4-12-21920-s004.pdf [file CAM4-12-21920-s004.pdf]
